# Supplementary material
Source: PubMed Central journal article supplement (PMC3083919)
Supplement: NIHMS288090-supplement-01.pdf [file NIHMS288090-supplement-01.pdf]

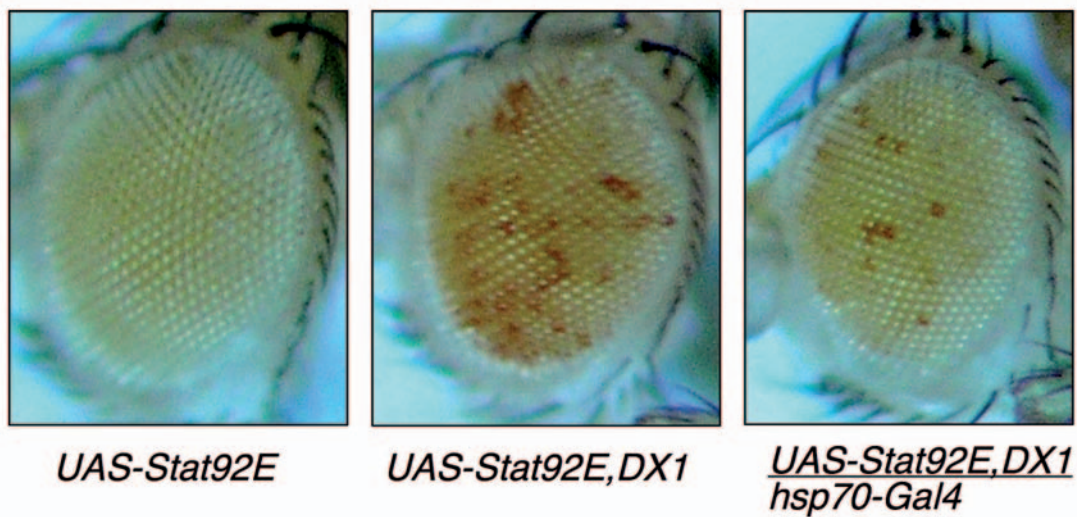

**Figure S1** STAT92E enhances repeat-mediated variegation. Eye pigmentation phenotypes of adult flies of indicated genotypes raised at 25°C. The light orange background was due to the presence of *mini-w<sup>+</sup>* in the *UAS-Stat92E<sup>+</sup>*

transgene. Note the decreased pigmentation when *UAS-Stat92E<sup>+</sup>* was expressed by the basal level of *hsp70-Gal4* transgene (which does not carry *mini-w<sup>+</sup>*).

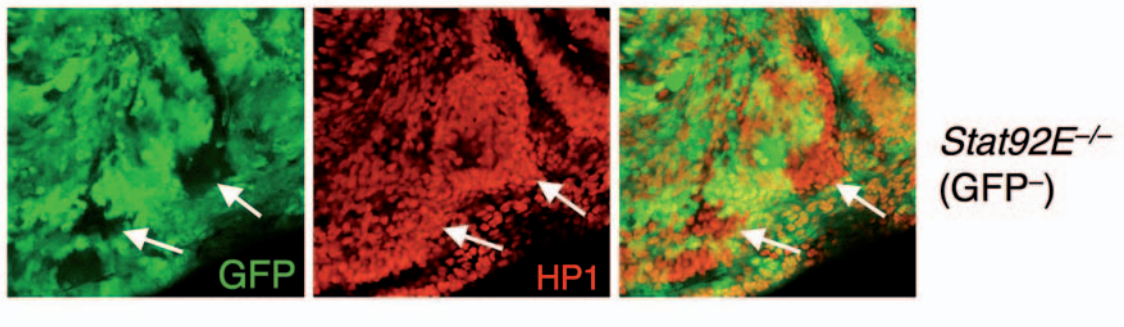

**Figure S2** Loss of Stat92E<sup>+</sup> does not affect HP1 expression in imaginal discs. A 3<sup>rd</sup> instar wing imaginal disc bearing *Stat92E<sup>-/-</sup>*

cells (marked by lack of GFP) is shown for HP1 levels (stained by anti-HP1, red).

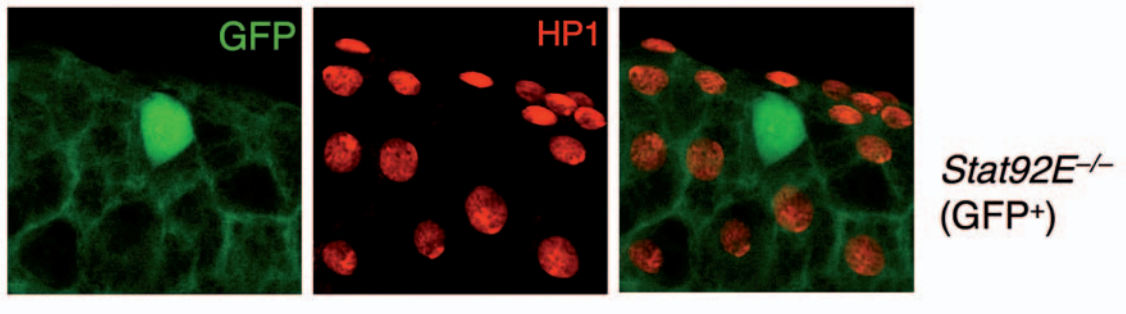

**Figure S3** Long-term loss of STAT92E reduced HP1. A *Stat92E* homozygous loss of function cell (marked by GFP) was induced during

embryogenesis and examined for HP1 (red) in late 3<sup>rd</sup> instar larval salivary gland.

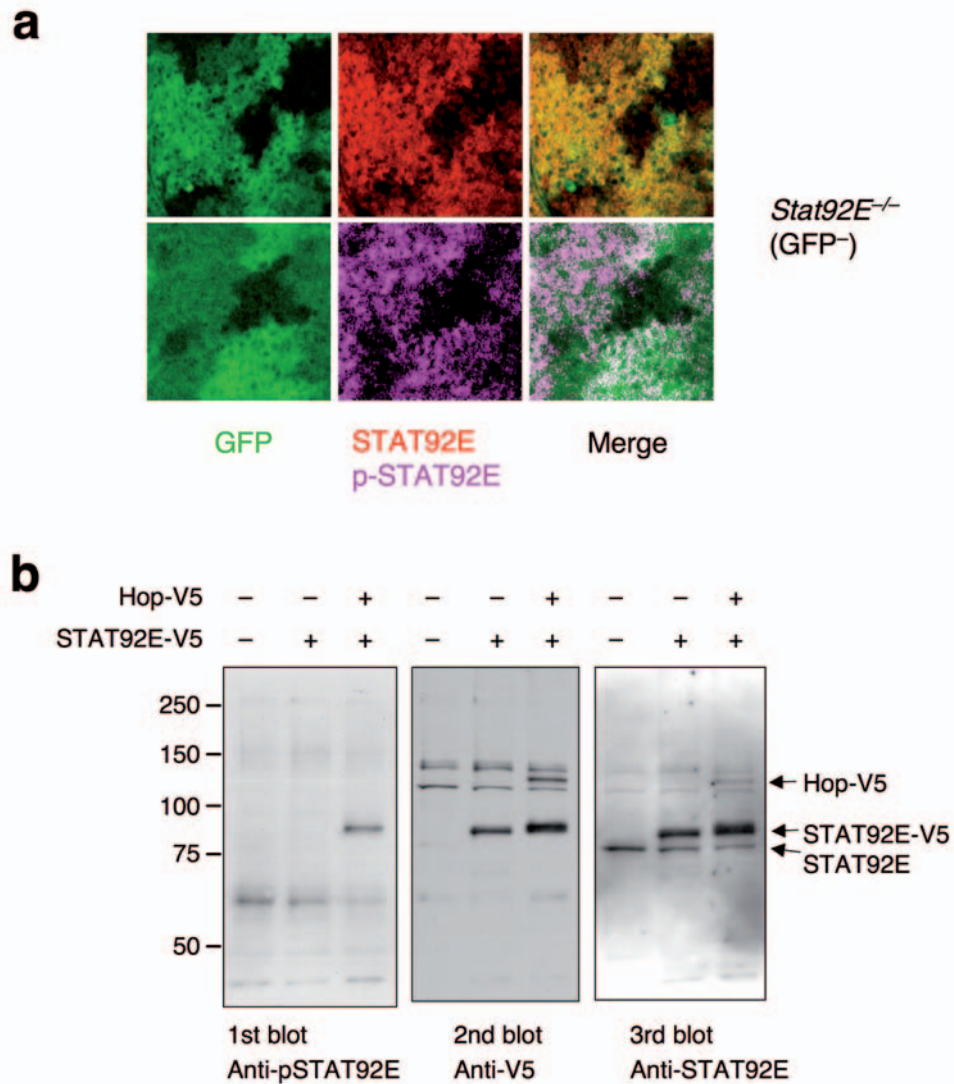

**Figure S4** Specificity of anti-STAT92E and anti-pSTAT92E. **(a)** A 3<sup>rd</sup> instar wing imaginal disc bearing *Stat92E<sup>-/-</sup>* cells (marked by lack of GFP) was stained by anti-STAT92E (red). Note that the red signals closely matches STAT92E protein levels, and that no signal is detected in *Stat92E<sup>-/-</sup>* cells. **(b)** S2 cells were transfected with Hop-V5 and/or STAT92E-V5. Total cell lysates were subjected to SDS-PAGE and transferred to nitrocellulose

membrane and immunoblotted sequentially with anti-pSTAT92E, anti-V5, and anti-STAT92E, respectively. Note that anti-pSTAT92E does not cross-react with non-phospho-STAT92E (lack of signals in lane 1, 2, left panel), and that anti-STAT92E does not detect other proteins (right panel). Extra bands on the right panel were due to incomplete stripping. Anti-V5 detected non-specific bands (bands across all 3 lanes in middle panel).

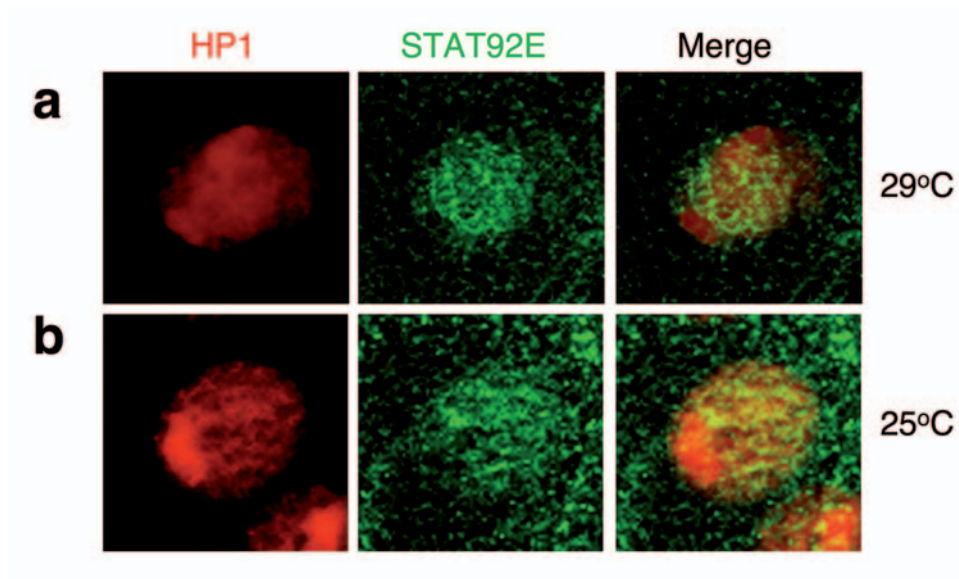

**Figure S5** HP1 and STAT92E distribution in *hop<sup>GOF</sup>* mutant larvae. Salivary glands isolated from *hop<sup>GOF/+</sup> (hop<sup>Tum-1/+</sup>)* larvae were stained with anti-HP1 (red) and anti-STAT92E (green). (a) In glands isolated from *hop<sup>Tum-1/+</sup>* larvae raised at 29°C, both HP1 and STAT92E appear diffused, lacking prominent heterochromatin foci. (b) In *hop<sup>Tum-1/+</sup>* larvae raised at 25°C, a moderately nonpermissive temperature<sup>1</sup>, a fraction of

the nuclei (32%; n=64/198 nuclei) exhibited nearly normal patterns of HP1 foci (left panel), whereas in nearly all of these nuclei (95%; n=61/64 nuclei), STAT92E appeared dispersed and did not colocalize with HP1 (middle panel). These results suggest that STAT92E disperses in response to Hop<sup>Tum-1</sup> phosphorylation, and this process precedes changes in HP1 subnuclear localization.

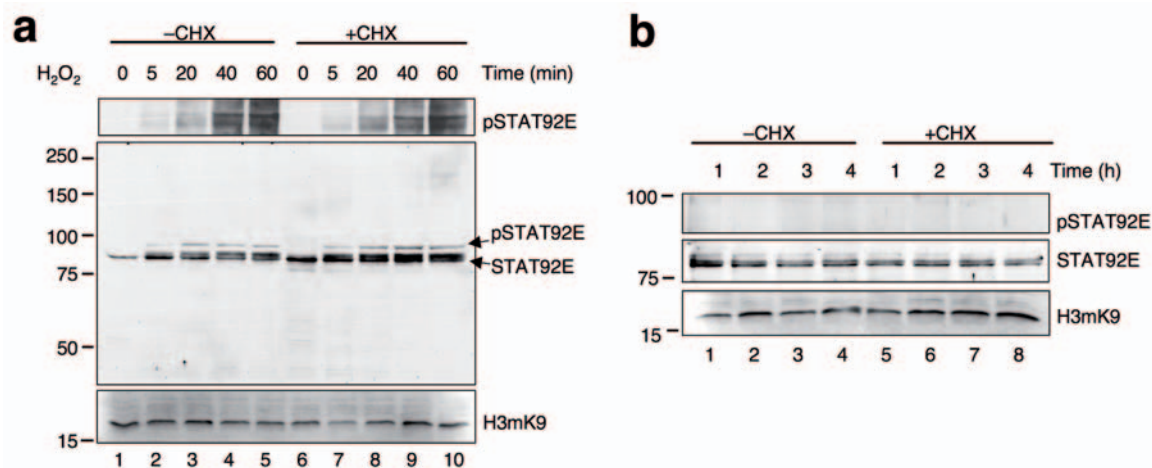

**Figure S6** Effects of H<sub>2</sub>O<sub>2</sub>/vanadate and CHX on STAT92E phosphorylation and histone H3 K9 methylation. S2 cells were cultured with or without CHX for 1 h, and then stimulated with H<sub>2</sub>O<sub>2</sub>/vanadate for indicated times (**a**), or

incubated in the presence of CHX for indicated times (**b**). Cell extracts were blotted sequentially with anti-pSTAT92E and anti-STAT92E, or with anti-H3mK9, respectively. Membrane was stripped between blots.

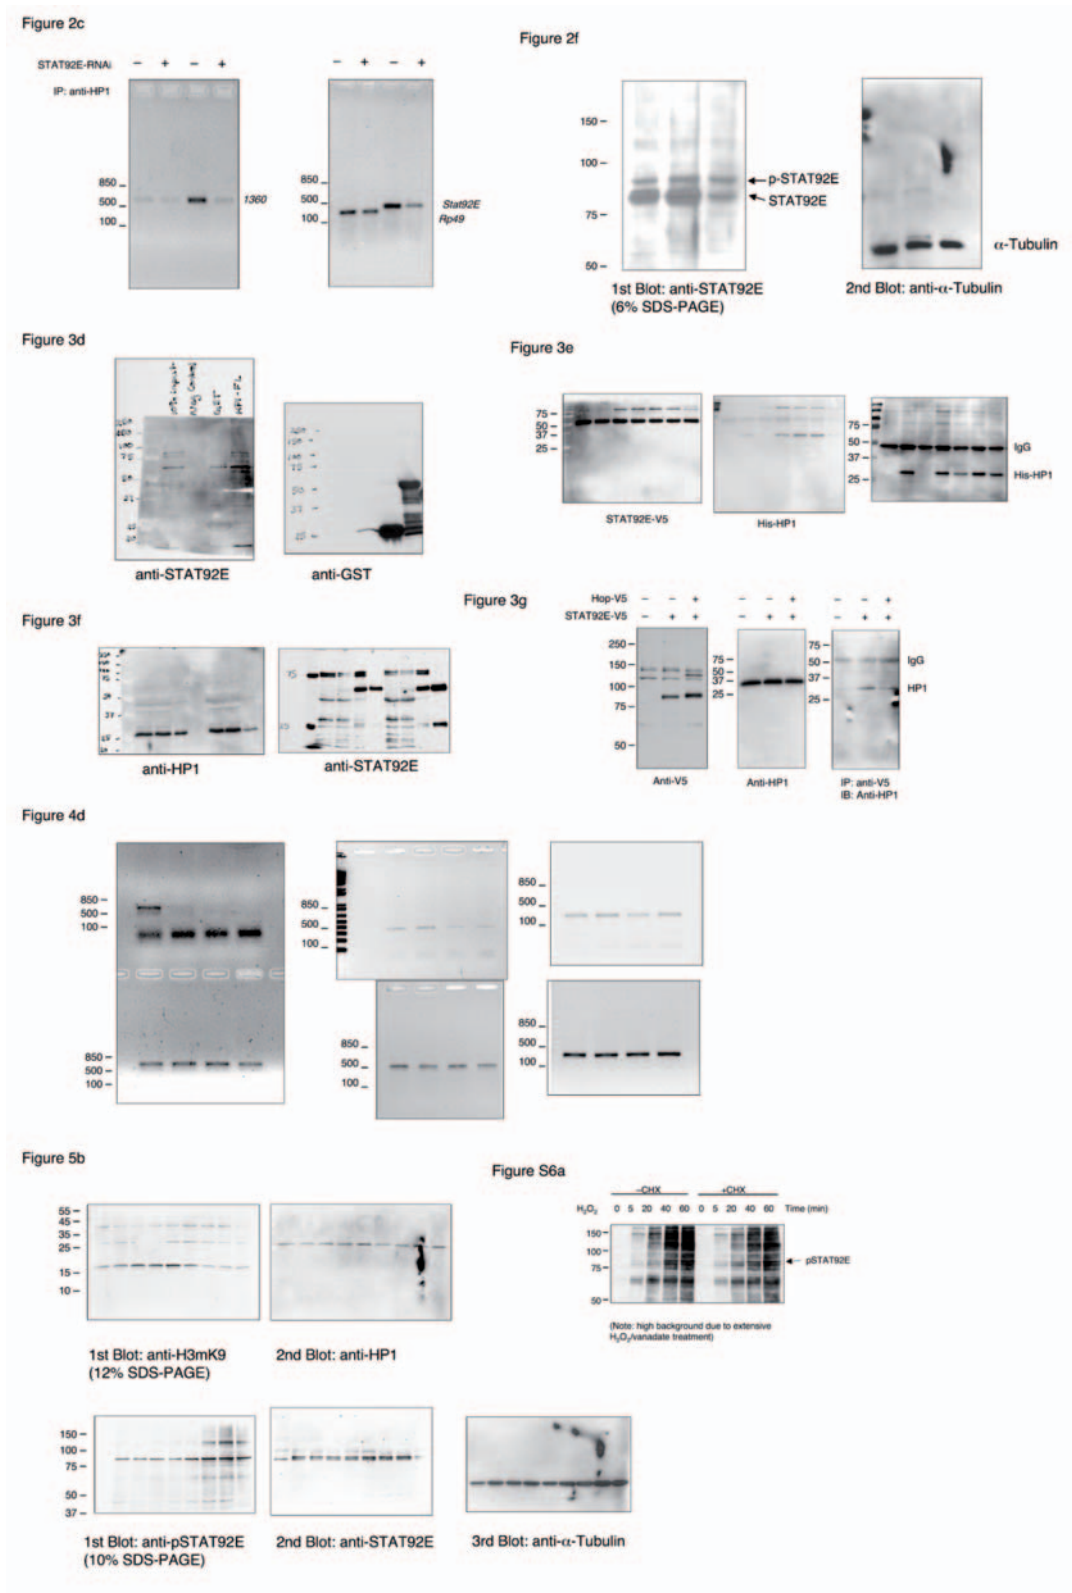

**Figure S7** Full-length protein gels. Note that Fig. 2f used a lower percentage gel and longer run, which resulted in a greater

separation phospho-STAT92E from STAT92E bands (compared with Fig. 5b).

**References:**

1. Hanratty, W. P. & Dearolf, C. R. The *Drosophila* Tumorous-lethal hematopoietic oncogene is a dominant mutation in the hopscotch locus. *Mol Gen Genet* 238, 33-7 (1993).
